# Supplementary material for: Alterations in Cerebrospinal Fluid Motion After Mild Traumatic Brain Injury: An Intravoxel Incoherent Motion Magnetic Resonance Imaging Analysis
Source: Research Square preprint supplement (doi:10.21203/rs.3.rs-6442459/v1), 2025-04-17
Supplement: Supplementary file 1 [file 8332c3f813f600de91eedae1.docx]

**Alterations in Cerebrospinal Fluid Motion After Mild Traumatic Brain Injury: An Intravoxel Incoherent Motion Magnetic Resonance Imaging Analysis**

**Journal Name: Neuroradiology**

**Author’s Names:** Shinya Watanabe1,2, Yasushi Shibata1,2, Eiichi Ishikawa2

**Affiliations:** 1Department of Neurosurgery, Mito Kyodo General Hospital, Tsukuba University Hospital Mito Area Medical Education Center, Mito, Japan

2Institute of Medicine, University of Tsukuba, Tsukuba, Japan

**Corresponding Author:**

Shinya Watanabe, M.D., Ph.D.

Department of Neurosurgery, Mito Kyodo General Hospital, Tsukuba University Hospital Mito Area Medical Education Center, 3-2-7 Miyamachi, Mito, Ibaraki, 310-0015, Japan

E-mail: [shinya-watanabey@md.tsukuba.ac.jp](mailto:shinya-watanabey@md.tsukuba.ac.jp)

**Supplementary Data 1: A trial protocol overview**

| **Study design** | **Prospective observational study** |
| --- | --- |
| **Study method** | Diffusion-weighted MRI is performed using a 3T MRI, a VINCENT IVIM map is used to select 33 ROIs, and the f-value§ is measured.  Analysis is performed on differences between two groups and an image follow-up of the disease groups. |
| **Endpoints** | **Primary**: f-value |
| **Subjective** | Patients with head trauma (traumatic subarachnoid hemorrhage, concussion, subdural hematoma, among others) |
| **Criteria**  -Inclusion  -Exclusion | Minor head injury (Glasgow coma scale score ≥13)  Patients aged <18 years |
| **Planned enrollment numbers** | 20 patients with head injury (T-group)  20 healthy patients (H-group) |
| **Informed consent** | Written consent |

§A quantitative value ranging from 0 to 100% indicating the microperfusion component
